# Supplementary material for: Host–guest inclusion complexes formed between a symmetrical tetrasubstituted cucurbit[6]uril and glycine
Source: Royal Society of Chemistry journal article supplement (doi:10.1039/d2ce01308h), 2022-01-01
Supplement: d2ce01308h1.pdf [file d2ce01308h1.pdf]

## Supporting Information

### Host-guest inclusion complexes formed between a symmetrical tetrasubstituted cucurbit[6]uril and glycine

Shang-Wei Yuan <sup>a</sup>, Pei-Hui Shan <sup>a</sup>, Mao-Xiao Yang <sup>a</sup>, Pei-Hua Ma <sup>a</sup>, Timothy J. Prior<sup>b</sup>,  
Carl Redshaw <sup>b\*</sup>, Gang Wei <sup>c\*</sup>, Zhu Tao <sup>a</sup>, Xin Xiao <sup>a,\*</sup>

<sup>a</sup> Key Laboratory of Macrocyclic and Supramolecular Chemistry of Guizhou Province, Institute of Applied Chemistry, Guizhou University, Guiyang, 550025, China. E-mail: gyhxxiaoxin@163.com or xxiao@gzu.edu.cn (Xin Xiao)

<sup>b</sup> Department of Chemistry, University of Hull, Hull HU6 7RX, U.K.  
E-mail: C.Redshaw@hull.ac.uk (Carl Redshaw)

<sup>c</sup> CSIRO Mineral Resources, PO Box 218, Lindfield, NSW 2070, Australia. E-mail: gang.wei@csiro.au (Gang Wei)

#### Contents

**Figure S1.** Interaction of Gly and TMeQ[6] (20 °C): <sup>1</sup>H NMR spectra (400 MHz, D<sub>2</sub>O) of (A) neat Gly, (B) in the presence of 1.0 equiv. of TMeQ[6] and 2.0 equiv. of Ca<sup>2+</sup>, (C) in the presence of 1.0 equiv. of TMeQ[6] and 1.0 equiv. of Ca<sup>2+</sup>, (D) in the presence of 1.0 equiv. of TMeQ[6], and (E) neat TMeQ[6].

**Figure S2.** Asymmetric unit of complex **1** with atoms drawn as 50% probability ellipsoids.

**Figure S3.** Extended asymmetric unit of complex **1** with atoms drawn as spheres of arbitrary radius. Dashed lines show hydrogen bonds

**Figure S4.** Location of two guest molecules (space-filling representation) within TMeQ6 bowls (spheres).

**Table S1.** Crystal data as well as details of data collection and refinement for compounds **1** and **2**.

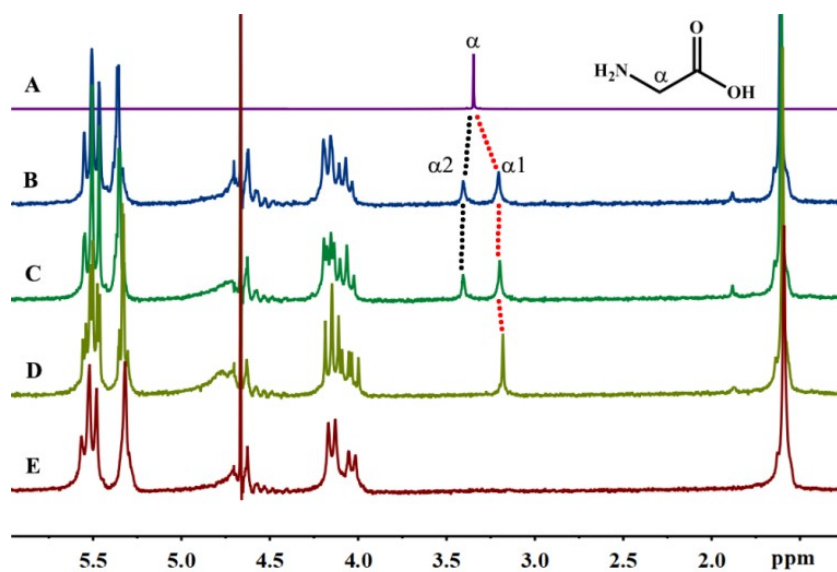

**Figure S1.** Interaction of Gly and TMeQ[6] (20 °C): <sup>1</sup>H NMR spectra (400 MHz, D<sub>2</sub>O) of (A) neat Gly, (B) in the presence of 1.0 equiv. of TMeQ[6] and 2.0 equiv. of Ca<sup>2+</sup>, (C) in the presence of 1.0 equiv. of TMeQ[6] and 1.0 equiv. of Ca<sup>2+</sup>, (D) in the presence of 1.0 equiv. of TMeQ[6], and (E) neat TMeQ[6]

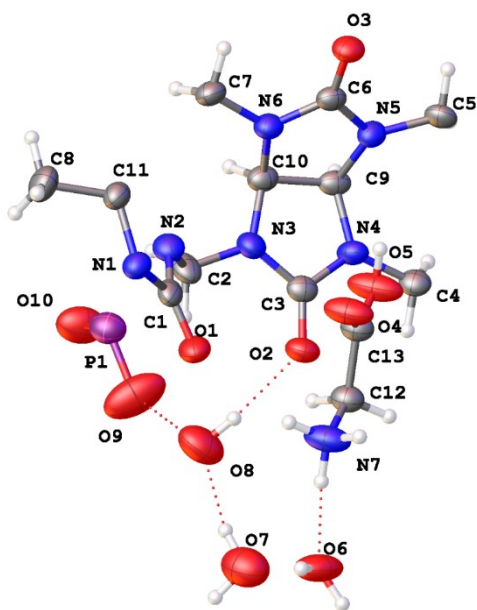

**Figure S2.** Asymmetric unit of complex **1** with atoms drawn as 50% probability ellipsoids.

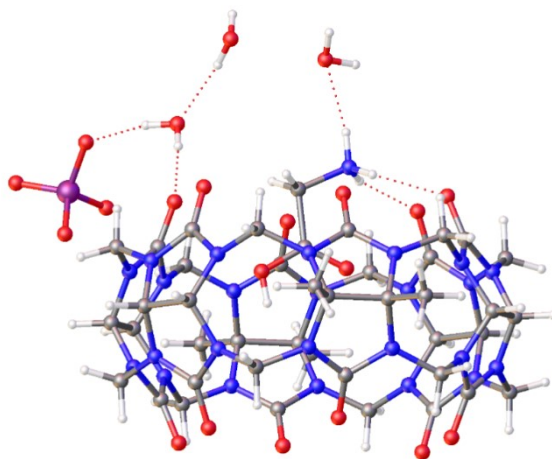

**Figure S3.** Extended asymmetric unit of complex **1** with atoms drawn as spheres of arbitrary radius. Dashed lines show hydrogen bonds.

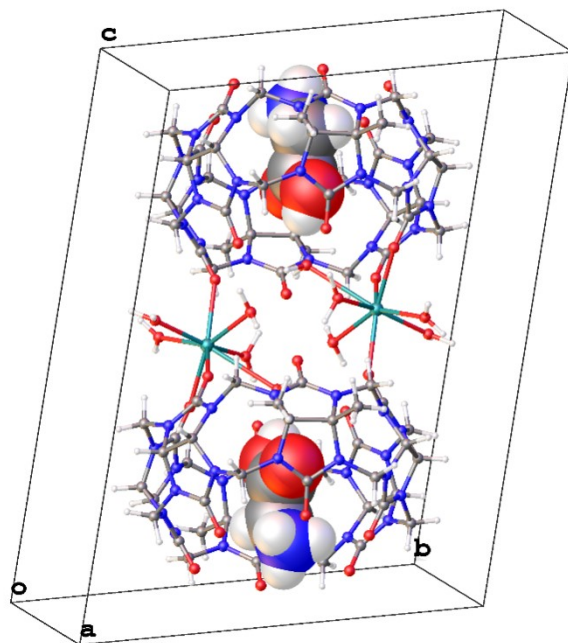

**Figure S4.** Location of two guest molecules (space-filling representation) within TMeQ6 bowls (spheres).

**Table S1.** Crystal data as well as details of data collection and refinement for compounds **1** and **2**.

|                                                   |                                                                                                                                                                                        |                                                                                                                                                                      |
|---------------------------------------------------|----------------------------------------------------------------------------------------------------------------------------------------------------------------------------------------|----------------------------------------------------------------------------------------------------------------------------------------------------------------------|
| <b>Identification code</b>                        | <b>1</b>                                                                                                                                                                               | <b>2</b>                                                                                                                                                             |
| <b>Empirical formula</b>                          | C <sub>44</sub> H <sub>80</sub> N <sub>26</sub> O <sub>34</sub> P <sub>2</sub>                                                                                                         | C <sub>42</sub> H <sub>92</sub> N <sub>25</sub> O <sub>35</sub> CaCl <sub>3</sub>                                                                                    |
| <b>Formula weight</b>                             | 1579.24                                                                                                                                                                                | 1653.83                                                                                                                                                              |
| <b>Structural formula</b>                         | C <sub>40</sub> H <sub>44</sub> N <sub>24</sub> O <sub>12</sub> , (PO <sub>4</sub> ) <sub>2</sub> ,<br>2H <sub>3</sub> NCH <sub>2</sub> COOH, 4(H <sub>3</sub> O), 6(H <sub>2</sub> O) | (C <sub>40</sub> H <sub>44</sub> N <sub>24</sub> O <sub>12</sub> )Ca(H <sub>2</sub> O) <sub>5</sub> ,3Cl,<br>NH <sub>3</sub> CH <sub>2</sub> COOH,16H <sub>2</sub> O |
| <b>Temperature/K</b>                              | 296                                                                                                                                                                                    | 296                                                                                                                                                                  |
| <b>Crystal system</b>                             | monoclinic                                                                                                                                                                             | triclinic                                                                                                                                                            |
| <b>Space group</b>                                | C2/m                                                                                                                                                                                   | P-1                                                                                                                                                                  |
| <b>a/Å</b>                                        | 12.878(3)                                                                                                                                                                              | 13.001(4)                                                                                                                                                            |
| <b>b/Å</b>                                        | 20.372(5)                                                                                                                                                                              | 14.691(4)                                                                                                                                                            |
| <b>c/Å</b>                                        | 12.609(5)                                                                                                                                                                              | 21.030(6)                                                                                                                                                            |
| <b>α/°</b>                                        | 90                                                                                                                                                                                     | 72.765(7)                                                                                                                                                            |
| <b>β/°</b>                                        | 106.828(6)                                                                                                                                                                             | 76.725(7)                                                                                                                                                            |
| <b>γ/°</b>                                        | 90                                                                                                                                                                                     | 68.800(7)                                                                                                                                                            |
| <b>Volume/Å<sup>3</sup></b>                       | 3166.3(16)                                                                                                                                                                             | 3542.8(18)                                                                                                                                                           |
| <b>Z</b>                                          | 2                                                                                                                                                                                      | 2                                                                                                                                                                    |
| <b>ρ<sub>calc</sub>/g/cm<sup>3</sup></b>          | 1.652                                                                                                                                                                                  | 1.550                                                                                                                                                                |
| <b>μ/mm<sup>-1</sup></b>                          | 0.189                                                                                                                                                                                  | 0.310                                                                                                                                                                |
| <b>F(000)</b>                                     | 1648.0                                                                                                                                                                                 | 1740.0                                                                                                                                                               |
| <b>Crystal size/mm<sup>3</sup></b>                | 0.21 × 0.18 × 0.14                                                                                                                                                                     | 0.17 × 0.16 × 0.14                                                                                                                                                   |
| <b>Radiation (MoKα)</b>                           | λ = 0.71073                                                                                                                                                                            | λ = 0.71073                                                                                                                                                          |
| <b>2θ range for data collection/°</b>             | 5.234 to 51.022                                                                                                                                                                        | 3.256 to 50.054                                                                                                                                                      |
| <b>Index ranges</b>                               | -15 ≤ h ≤ 15, -24 ≤ k ≤ 24,<br>-15 ≤ l ≤ 15                                                                                                                                            | -15 ≤ h ≤ 15, -17 ≤ k ≤ 17,<br>-25 ≤ l ≤ 25,                                                                                                                         |
| <b>Reflections collected</b>                      | 57878                                                                                                                                                                                  | 44481                                                                                                                                                                |
| <b>Independent reflections</b>                    | 3047<br>[R <sub>int</sub> = 0.0937, R <sub>sigma</sub> = 0.0252]                                                                                                                       | 12511<br>[R <sub>int</sub> = 0.0621, R <sub>sigma</sub> = 0.0522]                                                                                                    |
| <b>Data/restraints/parameters</b>                 | 3047/0/266                                                                                                                                                                             | 12511/0/822                                                                                                                                                          |
| <b>Goodness-of-fit on F<sup>2</sup></b>           | 1.042                                                                                                                                                                                  | 1.040                                                                                                                                                                |
| <b>Final R indexes [I ≥ 2σ(I)]</b>                | R <sub>1</sub> = 0.0394, wR <sub>2</sub> = 0.1031                                                                                                                                      | R <sub>1</sub> = 0.0698, wR <sub>2</sub> = 0.1809                                                                                                                    |
| <b>Final R indexes [all data]</b>                 | R <sub>1</sub> = 0.0556, wR <sub>2</sub> = 0.1126                                                                                                                                      | R <sub>1</sub> = 0.0983, wR <sub>2</sub> = 0.1972                                                                                                                    |
| <b>Largest diff. peak/hole / e Å<sup>-3</sup></b> | 0.35/-0.27                                                                                                                                                                             | 0.48/-0.59                                                                                                                                                           |
